# Supplementary material for: High-efficiency microwave absorbing performance originating from sufficient magnetic exchange coupling interaction and impressive dielectric loss
Source: Royal Society of Chemistry journal article supplement (doi:10.1039/d0tc05222a), 2020-12-24
Supplement: d0tc05222a1.pdf [file d0tc05222a1.pdf]

## **Supporting Information**

**High-efficiency microwave absorbing performance originating from sufficient magnetic exchange coupling interaction and impressive dielectric loss**

Gang Fang<sup>1</sup>, Chuyang Liu<sup>1,2\*</sup>, Yun Yang<sup>1</sup>, Kangsen Peng<sup>1</sup>, Yufan Cao<sup>1</sup>,  
Guoyue Xu<sup>1</sup>, Yujing Zhang<sup>2,3</sup>

- 1. School of Material Science and Technology, Nanjing University of Aeronautics and Astronautics, Nanjing, 211106, China*
- 2. State Key Lab of Silicon Materials, Zhejiang University, Hangzhou, 310027, China*
- 3. School of Materials Science and Engineering, Nanjing University of Science and Technology, Nanjing 210094, China*

## Figures

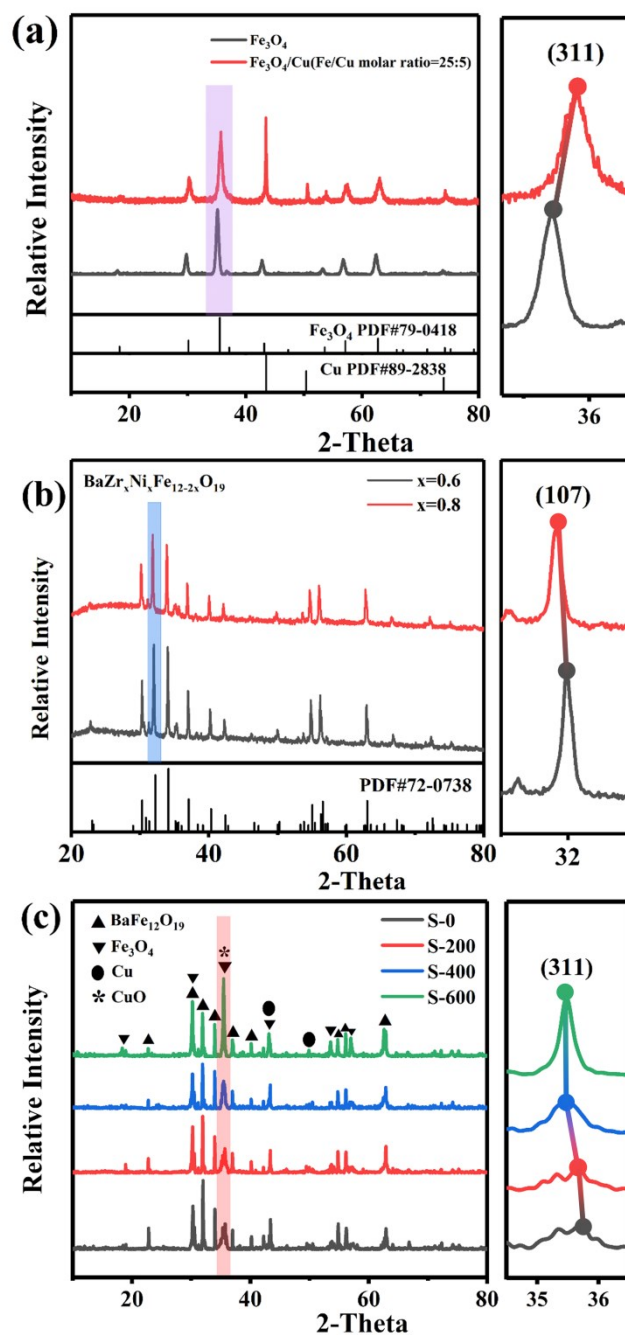

Fig. S1. XRD patterns of (a) pure  $\text{Fe}_3\text{O}_4$  and  $\text{Fe}_3\text{O}_4/\text{Cu}$  sample along with the magnified XRD patterns of (311) lattice plane; (b)  $\text{BaZr}_x\text{Ni}_x\text{Fe}_{12-2x}\text{O}_{19}$  samples with  $x=0.6$ , and 0.8 as well as the magnified XRD patterns of (107) lattice plane; (c) S-0, S-200, S-400 and S-600 along with the magnified XRD patterns of the (311) lattice plane.

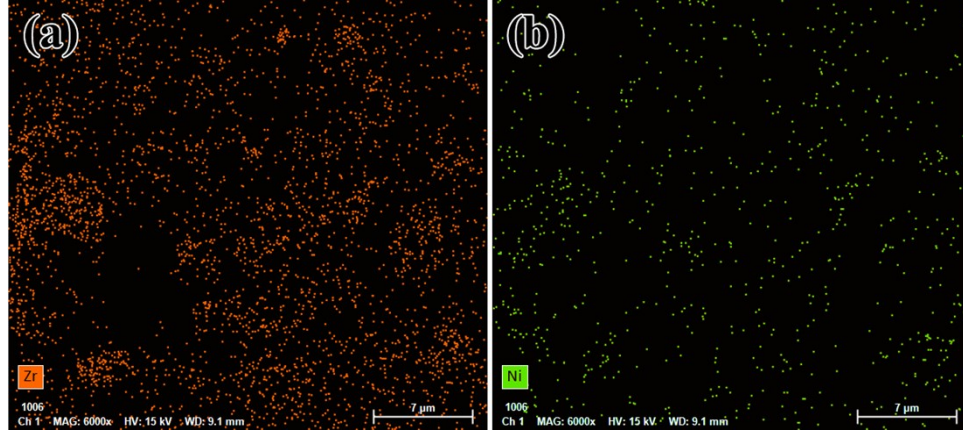

Fig. S2. The EDS element mapping of (a) Zr and (b) Ni for S-0.

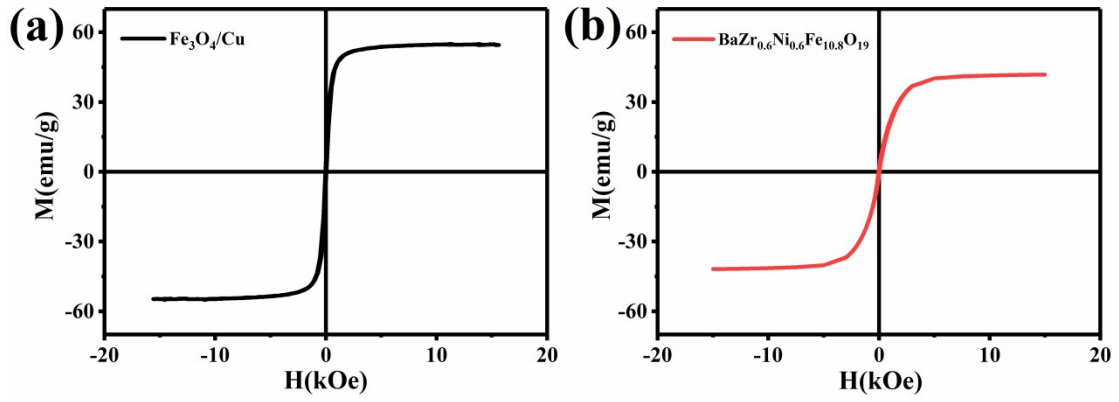

Fig. S3. Hysteresis loop of (a)  $\text{Fe}_3\text{O}_4/\text{Cu}$ , (b)  $\text{BaZr}_{0.6}\text{Ni}_{0.6}\text{Fe}_{10.8}\text{O}_{19}$ .

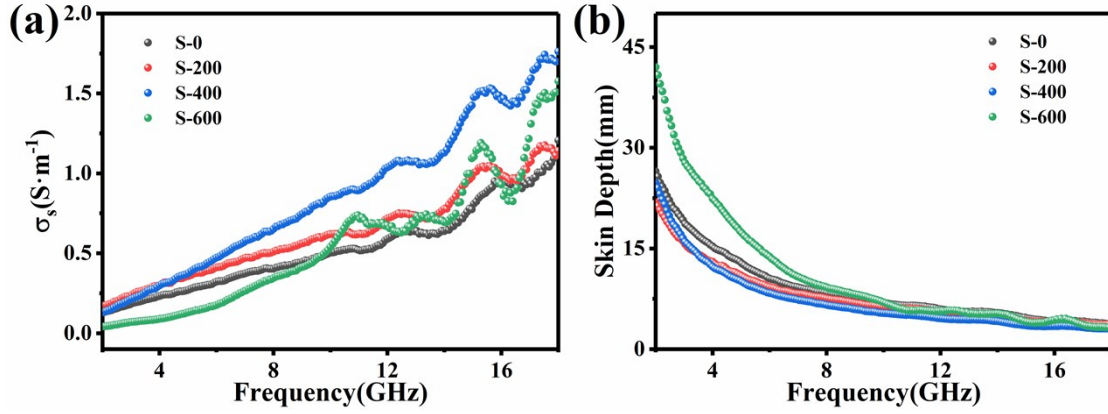

Fig. S4. (a) The AC conductivities and (b) skin depths of all samples over 2~18 GHz.
